# Supplementary material for: Distinct modes of perimembrane TRP channel turnover revealed by TIR-FRAP
Source: PubMed Central journal article supplement — Sci Rep. 2014 Nov 19;4:7111. doi: 10.1038/srep07111 (PMC4236744; doi:10.1038/srep07111), 2014-11-19
Supplement: srep07111-s6.pdf [file srep07111-s6.pdf]

**Distinct modes of perimembrane TRP channel turnover  
revealed by TIR-FRAP**

**Debapriya Ghosh, Andrei Segal, Thomas Voets\***

**Supplementary Information**

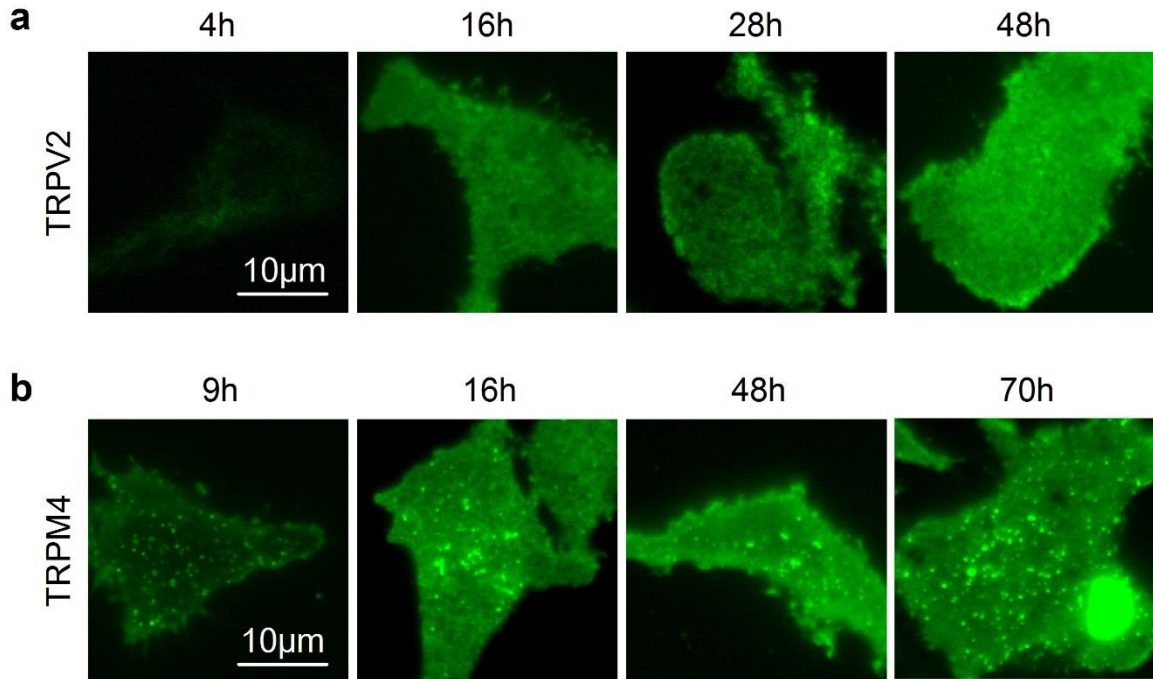

Figure S1. TRP channel fluorescence in TIRF at different time points after transfection

Representative TIRF micrographs of HEK293 cells expressing TRPM4-GFP (a) and TRPV2-GFP (b) at different time points post transfection. Distinct vesicular appearance is evident in TRPM4-GFP cells at all time points, whereas similar vesicular presence cannot be discerned in TRPV2-GFP cells at any time point.
